# Supplementary material
Source: PubMed Central journal article supplement (PMC4197077)
Supplement: NIHMS620821-supplement-SDC_1.pdf [file NIHMS620821-supplement-SDC_1.pdf]

**Supplemental Digital Content 1.** Table with the codes used in defining cohort and variables.

| <b>Description</b>        | <b>Code source</b>              | <b>Codes</b>                                                                                                                                                                                                                                                                                  |
|---------------------------|---------------------------------|-----------------------------------------------------------------------------------------------------------------------------------------------------------------------------------------------------------------------------------------------------------------------------------------------|
| <i>Cancer codes</i>       |                                 |                                                                                                                                                                                                                                                                                               |
| Colon cancer              | PEDSF file                      | 15-22                                                                                                                                                                                                                                                                                         |
| Adenocarcinoma            | ICD-O-3                         | 8140, 8210, 8480, 8481                                                                                                                                                                                                                                                                        |
| <i>Sentinel symptoms</i>  |                                 |                                                                                                                                                                                                                                                                                               |
| Anemia                    | ICD-9                           | 280, 280.0, 280.9, 281.9, 285.1, 285.2, 285.22, 285.29, 285.9                                                                                                                                                                                                                                 |
| Gastrointestinal symptoms |                                 |                                                                                                                                                                                                                                                                                               |
| Abdominal distention      |                                 | 787.3                                                                                                                                                                                                                                                                                         |
| Change in bowel habit     |                                 | 787.99                                                                                                                                                                                                                                                                                        |
| Constipation              |                                 | 564.0 , 564.00, 564.01, 564.02, 564.09                                                                                                                                                                                                                                                        |
| Irritable bowel syndrome  |                                 | 564.1                                                                                                                                                                                                                                                                                         |
| Diarrhea                  |                                 | 564.5, 787.91                                                                                                                                                                                                                                                                                 |
| Large bowel obstruction   |                                 | 560, 560.8, 560.9, 560.89                                                                                                                                                                                                                                                                     |
| Abnormal weight loss      |                                 | 783.2, 783.21, 783.0                                                                                                                                                                                                                                                                          |
| Asthenia                  |                                 | 780.79, 799.3                                                                                                                                                                                                                                                                                 |
| <i>Staging tests</i>      |                                 |                                                                                                                                                                                                                                                                                               |
| Colonoscopy               | HCPCS<br>ICD-9                  | 45378, 45380, 45381, 45383 , 45384, 45385, G0105, G0121<br>45.23, 45.25                                                                                                                                                                                                                       |
| Abdominal CT scan         | HCPCS<br>ICD-9                  | 74150, 74160, 74170<br>88.01, 88.02                                                                                                                                                                                                                                                           |
| Pelvic CT scan            | HCPCS<br>ICD-9                  | 72192, 72193, 72194<br>N/A                                                                                                                                                                                                                                                                    |
| <i>Treatments</i>         |                                 |                                                                                                                                                                                                                                                                                               |
| Colon surgery             | HCPCS<br><br>ICD-9<br><br>Betos | 44140, 44141, 44143, 44144, 44145, 44146, 44147, 44150, 44151, 44152, 44153, 44155, 44156, 44157, 44158, 44160, 44204, 44205, 44206, 44207, 44208, 44210, 44211, 44212<br>45.72, 45.73, 45.74, 45.75, 45.76, 45.8, 17.3, 17.31, 17.32, 17.33, 17.34, 17.35, 17.36, 17.37, 17.38, 17.39<br>P1B |

**Supplemental Digital Content 1 (continued).** Table with the codes used in defining cohort and variables.

| <b>Description</b>                 | <b>Code source</b> | <b>Codes</b>                                                                                                                                                                                                                                                                                                                                          |
|------------------------------------|--------------------|-------------------------------------------------------------------------------------------------------------------------------------------------------------------------------------------------------------------------------------------------------------------------------------------------------------------------------------------------------|
| Radiotherapy                       | HCPCS              | 77401-77499, 77750-77799, 77371-77373, G0174, G0251, G0339, G0340.                                                                                                                                                                                                                                                                                    |
|                                    | ICD-9              | 92.2, 92.20, 92.21, 92.22, 92.23, 92.24, 92.25, 92.26, 92.27, 92.29, 92.3, 92.30, 92.31, 92.32, 92.33, 92.34, 92.35, 92.36, 92.37, 92.38, 92.39, 92.4, 92.41, V580, V661, V671                                                                                                                                                                        |
|                                    | Revenue center     | 0330, 0333, 0339                                                                                                                                                                                                                                                                                                                                      |
| Chemotherapy <sup>1</sup>          | Betos              | P7A                                                                                                                                                                                                                                                                                                                                                   |
|                                    | HCPCS              | J9000-J9999**, Q0083-Q0085, J8520, J8521, J8530, J8540, J8560, J8597, J8610, J8999                                                                                                                                                                                                                                                                    |
|                                    | ICD-9              | 9925, V581, V662, V672                                                                                                                                                                                                                                                                                                                                |
|                                    | Revenue center     | 0331, 0332, 0335                                                                                                                                                                                                                                                                                                                                      |
| <i>Covariates</i>                  |                    |                                                                                                                                                                                                                                                                                                                                                       |
| Low complexity visits              | HCPCS              | 99201, 99202, 99211, 99212, 99213, 99387, 99397, 99401, 99402, 99403, 99404.                                                                                                                                                                                                                                                                          |
| Visits to the emergency department | HCPCS              | 99281, 99282, 99283, 99284, 99285, 99291, 99292                                                                                                                                                                                                                                                                                                       |
| Clinical evaluation <sup>3</sup>   | HCPCS              | 99201, 99202, 99203, 99204, 99205, 99211, 99212, 99213, 99214, 99215, 99217, 99218, 99219, 99220, 99221, 99222, 99223, 99231, 99232, 99233, 99234, 99235, 99236, 99241, 99242, 99243, 99244, 99245, 99251, 99252, 99253, 99254, 99255, 99261, 99262, 99263, 99271, 99272, 99273, 99274, 99275, 99301, 99302, 99303, 99311, 99312, 99313, 99361, 99362 |
| Provider type                      | Hospital file      | <i>Non-profit:</i> variable prov2885, values 01, 02, 03; variable f25, values 1, 2.<br><i>Proprietary:</i> variable prov2885, value 04; variable f25, values 3-6.<br><i>Government:</i> variable prov2885, values 05, 06, 07, 08; variable f25, values 7-13                                                                                           |

<sup>1</sup> To identify oral capecitabine in the DME file we used the following National Drug Codes: 00004110020, 00004110150, 00004110116, 00004110051, 00004110013, 00004110022, 00004110113, 00004110151.

<sup>2</sup> Excluding the following codes from this sequence: J9003, J9165, J9175, J9202, J9209, J9212- J9226, J9240, J9295, J9381, J9395.

<sup>3</sup> Clinical evaluation consists on any of the following: new outpatient, established outpatient, hospital observation services, new inpatient, established inpatient, observation/inpatient care services, outpatient consultation, inpatient consultation, follow-up inpatient consultation, confirmatory consultation, nursing facility services and team conference.
