# Supplementary material
Source: PubMed Central journal article supplement (PMC4197077)
Supplement: NIHMS620821-supplement-SDC_2.pdf [file NIHMS620821-supplement-SDC_2.pdf]

**Supplemental Digital Content 2.** ICD-9 codes used to identify acute abdomino-pelvic conditions.

| Condition                                              | ICD-9 code                                                                                                                                                                                                                                                    |
|--------------------------------------------------------|---------------------------------------------------------------------------------------------------------------------------------------------------------------------------------------------------------------------------------------------------------------|
| Abdominal/pelvic pain                                  | 789.0-789.2, 789.4-789.9, 338.1                                                                                                                                                                                                                               |
| Appendicitis                                           | 540.0, 540.1, 540.9, 541, 542                                                                                                                                                                                                                                 |
| Acute/subacute necrosis of liver                       | 570                                                                                                                                                                                                                                                           |
| Acute viral hepatitis                                  | 070.0, 070.1                                                                                                                                                                                                                                                  |
| Liver abscess                                          | 572.0, 572.1                                                                                                                                                                                                                                                  |
| Cholangitis                                            | 576.1                                                                                                                                                                                                                                                         |
| Bile duct obstruction/perforation/fistula              | 576.2, 576.3, 576.4                                                                                                                                                                                                                                           |
| Cholecystitis, obstruction, perforation of gallbladder | 575.0, 575.1, 575.10, 575.12, 575.2, 575.4                                                                                                                                                                                                                    |
| Acute pancreatitis                                     | 577.0                                                                                                                                                                                                                                                         |
| Acute pyelonephritis                                   | 590.1                                                                                                                                                                                                                                                         |
| Renal/perinephric abscess                              | 590.2, 590.8, 590.80, 590.81, 590.9                                                                                                                                                                                                                           |
| Abdominal/pelvic inflammatory disease                  | 614.0-614.9, 615.0, 615.1, 615.9                                                                                                                                                                                                                              |
| Abdominal trauma                                       | 863, 863.0-863.9, 863.20, 863.21, 863.29, 863.30, 863.31, 863.39, 863.40-863.46, 863.49, 863.50-863.56, 863.59, 863.80-863.85, 863.89, 863.90-863.95, 863.99, 864.0, 864.1, 865.0, 865.1, 866.0, 866.1, 867.1-867.9, 868.0, 868.1, 869.0, 869.1, 922.2, 922.3 |
| Abdominal open wounds                                  | 879.2-879.6                                                                                                                                                                                                                                                   |
| Bowel obstruction                                      | 560, 560.0, 560.1-560.3, 560.30-560.32, 560.39, 560.8, 560.81, 560.89, 560.9, 569.87                                                                                                                                                                          |
| Shock                                                  | 958.4, 785.5, 785.50, 785.52, 785.59                                                                                                                                                                                                                          |
| Vascular insufficiency of the intestine                | 557.0, 557.1, 557.9                                                                                                                                                                                                                                           |
| Diverticulitis                                         | 562.01, 562.03, 562.11, 562.13                                                                                                                                                                                                                                |
| Peritonitis/abscess                                    | 567.0, 567.2, 567.21, 567.22, 567.23, 567.29, 567.8, 567.82, 567.89, 567.9, 569.5                                                                                                                                                                             |
| Retroperitoneal infections                             | 567.31, 567.38, 567.39                                                                                                                                                                                                                                        |
| Hemoperitoneum                                         | 568.81                                                                                                                                                                                                                                                        |
| Gastrointestinal bleeding                              | 578.1, 578.9, 578, 578.0                                                                                                                                                                                                                                      |
| Perforation                                            | 569.83                                                                                                                                                                                                                                                        |
