# Supplementary material
Source: PubMed Central journal article supplement (PMC4197077)
Supplement: NIHMS620821-supplement-SDC_3.pdf [file NIHMS620821-supplement-SDC_3.pdf]

**Supplemental Digital Content 3. Duplicated tests received.**

---

| <b>Patients with duplicated scans (N=3,456)</b>    |           |
|----------------------------------------------------|-----------|
| <b>Number of duplicated abdominal CT scans (%)</b> |           |
| 1                                                  | 2377 (89) |
| 2                                                  | 163 (6)   |
| 3+                                                 | 20 (1)    |
| <b>Number of duplicated pelvic CT scans (%)</b>    |           |
| 1                                                  | 1977 (74) |
| 2                                                  | 140 (5)   |
| 3+                                                 | 19 (1)    |

---
