# Supplementary material
Source: PubMed Central journal article supplement (PMC4197077)
Supplement: NIHMS620821-supplement-SDC_4.pdf [file NIHMS620821-supplement-SDC_4.pdf]

**Supplemental Digital Content 4.** Cloning, strategy assignment and different adjustments for the models

|                                                      | <b>Strategy I (not receiving duplicated scans)</b> | <b>Strategy II (receiving at least one duplicated scan)</b> |
|------------------------------------------------------|----------------------------------------------------|-------------------------------------------------------------|
| <b>No. of replicates</b>                             | 34,413                                             | 36291                                                       |
| <b>No. of months adherent</b>                        | 1,886,908                                          | 184,351                                                     |
| <b>Number of deaths<sup>1</sup></b>                  | 17,792                                             | 2,670                                                       |
| <b>Number of colon cancer deaths<sup>1</sup></b>     | 6,332                                              | 1,133                                                       |
| <b>Rate ratio for death<sup>2</sup></b>              | Reference                                          | 1.40 (1.35-1.46)                                            |
| <b>Rate ratio for death<sup>3</sup></b>              | Reference                                          | 1.33 (1.28-1.39)                                            |
| <b>Rate ratio for death<sup>4</sup></b>              | Reference                                          | 1.22 (1.16-1.28)                                            |
| <b>Rate ratio for colon cancer death<sup>2</sup></b> | Reference                                          | 1.35 (1.27-1.43)                                            |
| <b>Rate ratio for colon cancer death<sup>3</sup></b> | Reference                                          | 1.30 (1.23-1.38)                                            |
| <b>Rate ratio for colon cancer death<sup>4</sup></b> | Reference                                          | 1.23 (1.14-1.32)                                            |

<sup>1</sup>There are no deaths common to both strategies.

<sup>2</sup>Analysis adjusted only by age when staged.

<sup>3</sup>Analysis adjusted by the following baseline variables: age when staged, TNM stage, type of provider involved in the staging, sex, race, urbanicity, marital status, census region, grade of tumor differentiation, comorbidity index, preventive score, history of low complexity visits in the 2 years before diagnosis, year of diagnosis.

<sup>4</sup>Analysis adjusted by baseline variables and the following time-varying variables: clinical evaluations, visits to the emergency department, development of large bowel obstruction and comorbidity index.
